# Supplementary material for: The unequal vulnerability of communities of color to wildfire
Source: PubMed Central journal article supplement (PMC6214520; doi:10.1371/journal.pone.0205825), 2018-11-02

(A)

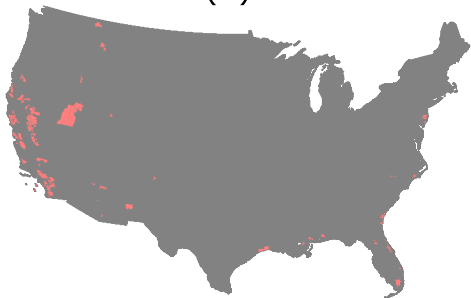

(B)

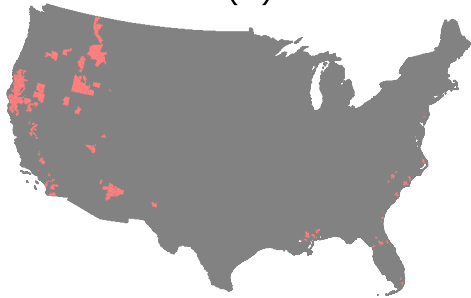

(C)

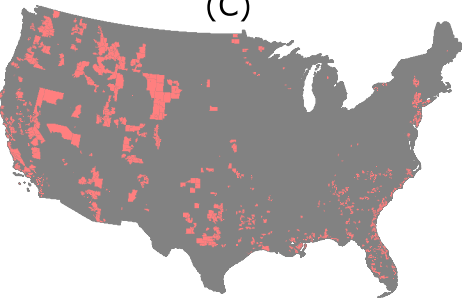

(D)

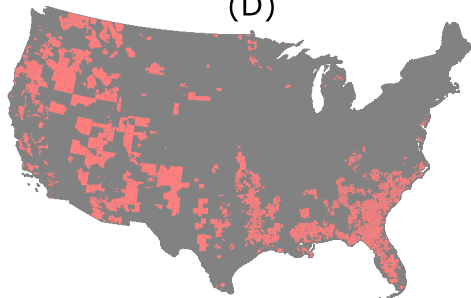

Supplement: pone.0205825.s001.pdf [file pone.0205825.s001.pdf]
