# Supplementary material for: The unequal vulnerability of communities of color to wildfire
Source: PubMed Central journal article supplement (PMC6214520; doi:10.1371/journal.pone.0205825), 2018-11-02

### Wildfire Hazard Potential (WHP)

Moderate

High

Very High

Federal Indian Reservations

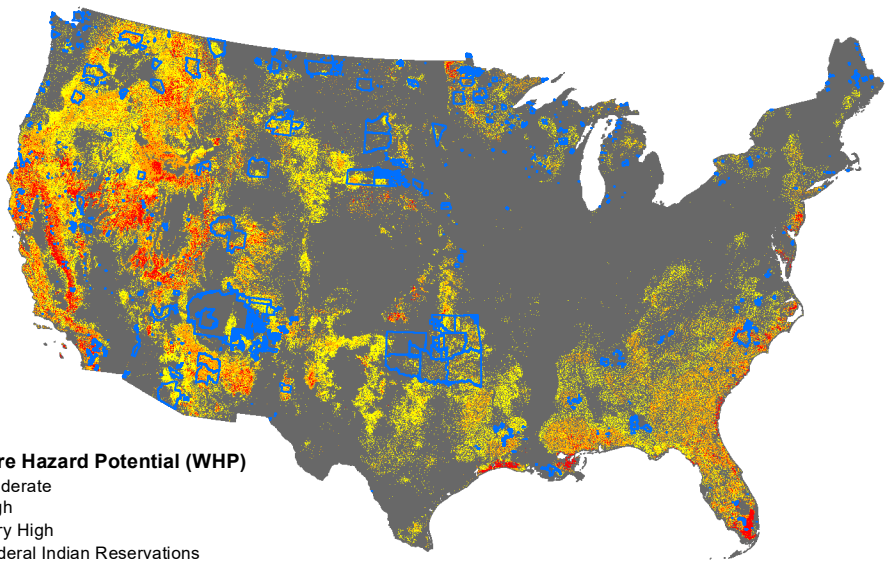

Supplement: pone.0205825.s002.pdf [file pone.0205825.s002.pdf]
