# Supplementary material for: The unequal vulnerability of communities of color to wildfire
Source: PubMed Central journal article supplement (PMC6214520; doi:10.1371/journal.pone.0205825), 2018-11-02

Resilience Index

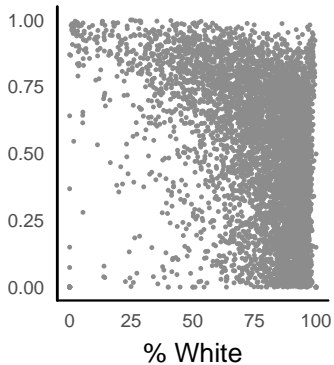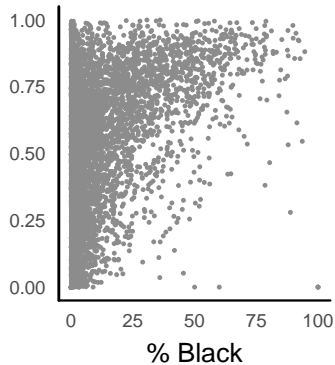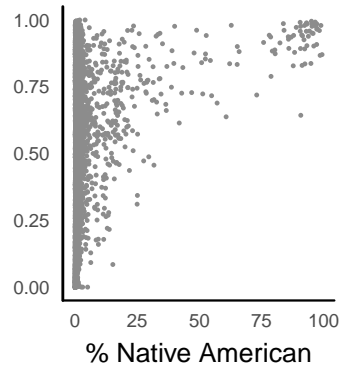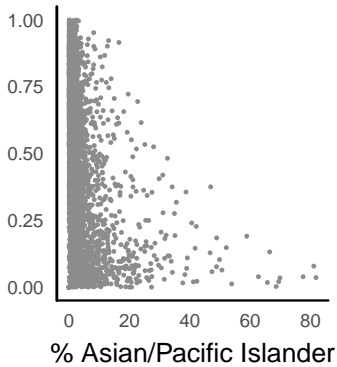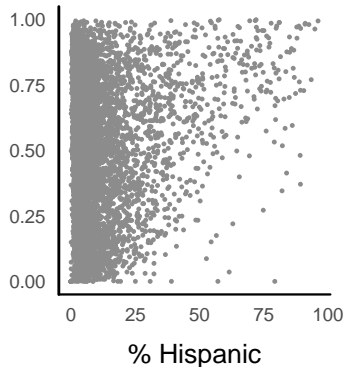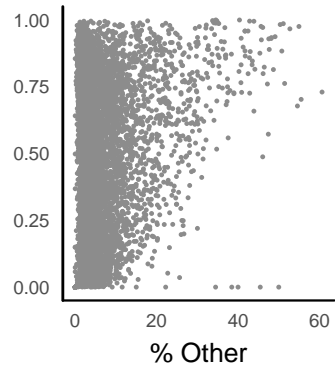

Supplement: pone.0205825.s004.pdf [file pone.0205825.s004.pdf]
